## Overexpression of midkine in lung tumors induced by *N*-nitrosobis(2-hydroxypropyl)amine in rats and its increase with progression

Hiroyuki Sakitani<sup>1,2</sup>, Masahiro Tsutsumi<sup>1,5</sup>, Kenji Kadomatsu<sup>3</sup>, Shinya Ikematsu<sup>4</sup>, Makoto Takahama<sup>1</sup>, Katsumichi Iki<sup>1</sup>, Toshifumi Tsujiuchi<sup>1</sup>, Takashi Muramatsu<sup>3</sup>, Sdatoshi Sakuma<sup>4</sup>, Toshisuke Sakaki<sup>2</sup> and Yoichi Konishi<sup>1</sup>

<sup>1</sup>Department of Oncological Pathology, Cancer Center, <sup>2</sup>Department of Neurosurgery, Nara Medical University, 840 Shijo-cho, Kashihara, Nara 634-8521, <sup>3</sup>Department of Biochemistry, Nagoya University School of Medicine, 65 Tsurumai-cho, Syowa-ku, Nagoya, Aichi 466-8550 and <sup>4</sup>Meiji Cell Technology Center, 540 Naruda Odawara 250-086, Japan

<sup>5</sup>To whom correspondence should be addressed  
Email: hyro-sa@nmu-gw.cc.naramed-u.ac.jp

**The expression of midkine (MK) in lung tumors induced by *N*-nitrosobis(2-hydroxypropyl)amine (BHP) in rats was examined. The animals were administered 2000 p.p.m. of BHP in their drinking water for 12 weeks, then maintained without further treatment until being killed 20–28 weeks after the beginning of the experiment. MK mRNA expression of adenocarcinomas and squamous cell carcinomas assessed by means of the reverse transcriptase–polymerase chain reaction and northern blot analysis was significantly higher than in rat embryonic tissues (positive controls) and contrasted strongly with the lack in normal lungs. MK protein was detected immunohistochemically in 58.3% of alveolar hyperplasias, 92.3% of adenomas and 100% of adenocarcinomas and squamous cell carcinomas. The extent of staining significantly increased along with malignant progression in adenomatous (pre-)neoplastic lesions and tended to become more pronounced with malignant progression in squamous lesions. The results suggest that MK may play some essential roles in the development and progression of lung tumors induced by BHP in rats.**

### Introduction

Growth factors, involved in angiogenesis, have been shown to play important roles in the development of neoplasms (1–5). They may be promoted by either direct mitogen effects on cancer cells or by an indirect influence on stromal and vascular elements (6). Changes may occur in co-ordinating interactions between tumor parenchymal and non-parenchymal tissues, and growth factors play regulatory roles in such events (7–11). Fibroblast growth factors, hepatocyte growth factor and platelet-derived growth factors share one particular characteristic in that their biological functions are modulated by their binding to and release from heparan sulfate, a heparin-related carbohydrate molecule existing on the cell surface and in extracellular matrices, which ensures their location in sites of action for appropriate periods, and they are thus called heparin-binding growth factors (12).

**Abbreviations:** BHP, *N*-nitrosobis(2-hydroxypropyl)amine; GAPDH, glyceraldehyde 3-phosphate dehydrogenase; MK, midkine; RT-PCR, reverse transcriptase–polymerase chain reaction; SDS, sodium dodecyl sulfate; SSC, standard saline citrate.

Midkine (MK) was originally identified as the product of a retinoic acid-responsive gene (13,14) and was then recognized to be a novel heparin-binding growth factor. Since it is strongly expressed in the mid-gestation period of mouse embryogenesis (15–17), MK was initially considered to solely regulate events in the differentiation and development of organs (18–20). More recently, it was shown that it also played important roles in tissue remodeling and angiogenesis through enhancing plasminogen activators (21). MK is normally highly expressed in small bowel epithelium, moderately expressed in the thyroid and is present only at a low level in lung, stomach, colon and kidney in man (26,29). Expression has frequently been reported in various human tumors, such as cancers of the gastrointestinal tract from the esophagus to rectum, the liver, pancreas, kidney, urinary bladder, lung and mammary gland, as well as neuroblastomas and astrocytomas in the brain (22–29). Especially in neuroblastomas and bladder carcinomas, the strength of MK expression correlates negatively with the patient's prognosis (23,28). Furthermore, an altered splicing form of MK mRNA has been detected in various human cancers (27,30–32). However, details of the roles of MK in carcinogenesis are still largely obscure and studies in animal models have so far been limited (33–38).

We have established a model for development of non-small cell lung carcinomas in rats by giving *N*-nitrosobis(2-hydroxypropyl)amine (BHP) in the drinking water, in which high yields of adenomatous and squamous pre-neoplastic and malignant lesions are induced (39,40). This model allows investigation of the molecular mechanisms that underlies the step-wise cancer development from the stage of early pre-neoplasia to advanced carcinomas, and is thus suitable to assess the contribution of MK to neoplasia in the lung. In the present study, we investigated MK expression in this model using reverse transcriptase–polymerase chain reaction (RT-PCR), northern blot analysis and immunohistochemical staining.

### Materials and methods

#### *Animals and treatments*

A total of 35 male Wistar rats and one pregnant female Wistar rat were obtained from Japan SLC (Hamamatsu, Shizuoka, Japan) at an age of 5 weeks, and were maintained under constant conditions of 25 ± 3°C, 55 ± 8% humidity and a 12 h dark–light cycle with free access to a basal diet (CE-2 diet; Clea Japan, Meguro, Tokyo, Japan) and drinking water throughout acclimation (1 week) and the experimental periods. After acclimatization, the males were divided into two groups. Group 1 consisted of 25 rats who received 2000 p.p.m. BHP (Nacalai Tesque, Kyoto, Japan) in drinking water for 15 weeks, and then received drinking water without BHP for 5–13 weeks. Group 2 consisted of 10 rats who were given drinking water without BHP throughout the experiment. The animals were killed under light ether anesthesia 20–28 weeks after the beginning of the experiment and the lungs were removed, fixed in 10% buffered formalin and routinely processed for embedding in paraffin and MK immunohistochemistry as described below. Additionally, tumors >5 mm in diameter were immediately excised and divided into two parts. One half was frozen in liquid nitrogen and stored at –80°C until use for RNA analyses. The remaining halves were made into paraffin blocks as above for histological evaluation using routine hematoxylin and eosin staining

and for MK immunohistochemistry. Diagnostic criteria for lung lesions were as previously described (39,40). For positive controls in the RNA analyses, five embryos were taken from the one pregnant rat at 14 days of gestation under light ether anesthesia and her whole tissue was immediately frozen in liquid nitrogen and stored at  $-80^{\circ}\text{C}$  until use.

#### RNA isolation and RT-PCR analysis

Using an ISOGEN kit (Nippon Gene, Toyama, Japan), total cellular RNA was extracted from five examples, each of whole embryonal tissues, normal lung tissues, adenocarcinomas and squamous cell carcinomas, according to the manufacturer's instructions. cDNA from total RNA was synthesized with a Superscript pre-amplification system (Gibco BRL, Life Technologies, Rockville, MD); briefly, a 3 mg aliquot of total RNA with 0.5 mg of oligo(dT) in diethylpyrocarbonate-treated water was incubated at  $70^{\circ}\text{C}$  for 10 min and on ice for 2 min. Then 7  $\mu\text{l}$  of reaction mixture (2  $\mu\text{l}$   $10\times$  PCR buffer, 2  $\mu\text{l}$  25 mM  $\text{MgCl}_2$ , 1  $\mu\text{l}$  10 mM dNTP mix, 2  $\mu\text{l}$  0.1 M dithiothreitol) was added to each sample and mixed, followed by incubation at  $42^{\circ}\text{C}$  for 5 min. An aliquot of 1  $\mu\text{l}$  (200 U) of SuperScript II RT was added and mixed, incubation was continued at  $42^{\circ}\text{C}$  for 50 min, and the reaction was terminated by heating to  $70^{\circ}\text{C}$  for 15 min. Then, first strand cDNA was purified by digestion with 1  $\mu\text{l}$  RNase H, and was used as a PCR template. Aliquots of 1  $\mu\text{l}$  of 10-fold diluted cDNA solutions were subjected to PCR in 20  $\mu\text{l}$  (2  $\mu\text{l}$   $10\times$  PCR buffer; 2  $\mu\text{l}$  dNTP mix; 0.1  $\mu\text{l}$  Taq DNA polymerase; 0.2  $\mu\text{l}$  primers; 14.7  $\mu\text{l}$  autoclaved, distilled water). Appropriate oligonucleotides for specific amplification of MK cDNA (13) were prepared with sequences of 5'-ATGCAGCACCGAGGCTTCTT-3' as the forward primer and 5'-GTCCTTTCCTTTTCCTTTCT-3' as the reverse primer. PCR was conducted with a GeneAmp DNA Amplification Reagent kit (Perkin-Elmer Cetus, Norwalk, WI) and Taq polymerase (Pharmacia Biotech, Uppsala, Sweden) with the following conditions; pre-heating at  $95^{\circ}\text{C}$  for 1 min, 35 cycles of 30 s denaturation at  $94^{\circ}\text{C}$ , a 60 s annealing at  $58^{\circ}\text{C}$ , a 60 s extension at  $72^{\circ}\text{C}$  and an 8 min post-extension at  $72^{\circ}\text{C}$ . The resultant PCR products were then electrophoresed in 1.2% agarose gels.

#### Northern blot analysis

Northern blot analysis was performed for four embryonal tissues, five adenocarcinomas, five squamous cell carcinomas and five normal lung tissues in which MK mRNA was detected by RT-PCR. Aliquots of 20  $\mu\text{g}$  RNA were electrophoresed in 1% agarose-formaldehyde gels and transferred to Biodyne A nylon membranes (Pall Biosupport, East Hills, NY). A 730 bp fragment of mouse MK cDNA (13) was generously provided by Dr K.Kadomatsu (Department of Biochemistry, Nagoya University School of Medicine, Aichi, Japan) and used as a probe. The probe was  $^{32}\text{P}$ -radiolabeled using a DNA Labeling kit (d-CTP) (Pharmacia Biotech) in a mixture of 50% formamide, 5 $\times$  standard saline citrate (SSC), 0.1 M phosphate buffer (pH 7.4), 5 $\times$  Denhardt's solution, 0.1% sodium dodecyl sulfate (SDS), 5 mM EDTA and 100 mg/ml salmon testis DNA (Sigma, St Louis, MO) overnight at  $45^{\circ}\text{C}$ . The membranes were baked at  $80^{\circ}\text{C}$  for 1 h and hybridized with  $1\times 10^6$  c.p.m./ml of the labeled probe, and blots were washed once in 2 $\times$  SSC and 0.1% SDS at room temperature for 15 min and twice in 2 $\times$  SSC and 0.1% SDS at  $55^{\circ}\text{C}$  for 15 min followed by exposure of Hyperfilm-MP (Amersham Japan, Tokyo, Japan) with an intensifying screen overnight at  $80^{\circ}\text{C}$ . After the exposure, the northern blots were re-probed with a glyceraldehyde 3-phosphate dehydrogenase (GAPDH) cDNA probe to confirm that similar amounts of RNA had been loaded and transferred from each sample. Densitometric analysis of gene expression was then performed with a BAS 1000 image analyzer (Fuji Photo Film, Tokyo, Japan) as previously described (43,44).

#### Immunohistochemical analysis

The immunohistochemical demonstration of anti-MK protein binding was achieved with a rabbit polyclonal anti-MK antibody (a gift from Dr K.Kadomatsu) and a LSAB 2 kit (Dako Japan, Kyoto, Japan) with visualization of the binding using 3,3'-diaminobenzidine tetrahydrochloride. Staining intensities were classified according to the proportions of positive cells, as: negative, none; slightly positive, <50%; positive, 50–90%; and strongly positive, >90%. The specificity of the binding was confirmed by negative control staining using rabbit non-immune serum instead of the primary antibody (data not shown).

#### Statistics

Statistical analyses were routinely performed using a personal computer as described elsewhere (41) for the levels of MK mRNA expression in embryonal tissues (positive controls) and for tumors using the Mann-Whitney *U*-test (two-tailed). Incidences of immunohistochemically demonstrated MK protein expression were evaluated with the  $\chi^2$  test.

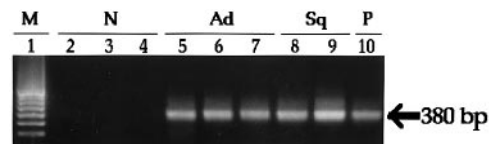

**Fig. 1.** Representative radiographical findings from RT-PCR analysis of MK mRNA in BHP-induced rat lung tumors. Arrows indicate the mature form of MK. Lane 1 (M), 100 bp ladder as the size marker; lanes 2–4 (N), normal lung tissues; lanes 5–7 (Ad), adenocarcinomas; truncated form is in evidence; lanes 8–9 (Sq), squamous cell carcinomas; lane 10 (P), embryonal tissue (positive control).

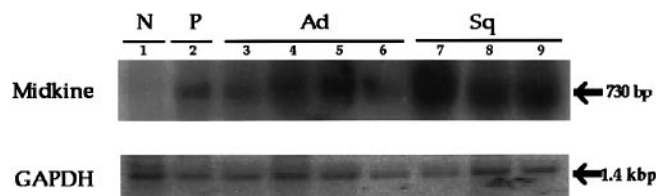

**Fig. 2.** Representative radiographical findings from northern blot analysis of MK gene expression in BHP-induced rat lung tumors. The GAPDH probe was co-hybridized to confirm the same amount of mRNA loading for each lane. Lane 1, normal lung tissue; lane 2, embryonic tissue (positive control); lanes 3–6, adenocarcinomas; lanes 7–9, squamous cell carcinomas.

## Results

### RT-PCR analysis for MK mRNA expression

The expression of MK mRNA was initially evaluated by RT-PCR with cDNA prepared from frozen sections of adenocarcinomas and squamous cell carcinomas, the representative radiographical findings are presented in Figure 1. Adenomas and squamous cell carcinomas could not be assessed because of limited tissue availability. Oligonucleotide primers in this study were used to amplify a 380 base cDNA for mouse MK2 (13). All of the analyzed adenocarcinomas and squamous cell carcinomas, as well as the embryonal tissues used as positive controls, produced products that corresponded to the expected PCR bands. Truncated variant forms of MK were not detected in any specimens. No PCR band was detected in the normal tissue case (Figure 1).

### Northern blot analysis for MK mRNA expression

The MK mRNA detected by RT-PCR in adenocarcinomas and squamous cell carcinomas was quantified by northern blot hybridization of total RNA extracted from such tumors; representative radiographical findings are shown in Figure 2. The 730 bp MK mRNA was strongly expressed in all of the adenocarcinoma and squamous cell carcinoma samples but not in any of normal lung tissues examined. The results of the MK gene quantification by densitometry with a normalization using the GAPDH value are summarized in Table I. MK transcript levels of adenocarcinomas and squamous cell carcinomas were both significantly higher than those of embryonal tissues.

### Immunohistochemical staining for MK protein

Positive anti-MK protein binding was immunohistochemically demonstrable in the cytoplasm of tumor cells (Figure 3) but not normal lung tissue (data not shown). Many of the alveolar hyperplasias showed negative (41.7%) or slightly positive (38.5%) staining and no lesions were strongly positive (Table II). In contrast, 34.6% of adenomas were strongly positive stained (Figure 3A) and only 7.7% were negative. The staining extent of adenomas and adenocarcinomas was significantly greater than that of alveolar hyperplasias

**Table I.** Densitometrically quantified data for MK mRNA expression in BHP-induced rat lung tumors

| Histology               | Sample No.                | Midkine mRNA expression <sup>a</sup> (arbitrary units) |
|-------------------------|---------------------------|--------------------------------------------------------|
| Embryonal tissue        | 1                         | 1.15                                                   |
|                         | 2                         | 1.17                                                   |
|                         | 3                         | 1.08                                                   |
|                         | 4                         | 1.18                                                   |
|                         | mean ± standard deviation | 1.41 ± 0.05                                            |
| Adenocarcinoma          | 5                         | 5.00                                                   |
|                         | 6                         | 6.97                                                   |
|                         | 7                         | 8.28                                                   |
|                         | 8                         | 5.65                                                   |
|                         | 9                         | 6.25                                                   |
|                         | mean ± standard deviation | 6.43 ± 1.26 <sup>b</sup>                               |
| Squamous cell carcinoma | 10                        | 8.81                                                   |
|                         | 11                        | 9.33                                                   |
|                         | 12                        | 8.87                                                   |
|                         | 13                        | 8.10                                                   |
|                         | 14                        | 7.87                                                   |
|                         | mean ± standard deviation | 8.60 ± 0.60 <sup>b</sup>                               |

<sup>a</sup>Normalized to GAPDH values.<sup>b</sup>Significantly higher than the embryonal tissue level ( $P < 0.05$ ).**Table II.** Summary of immunohistochemical findings for MK protein expression in BHP-induced rat lung tumors

| Histology               | Total number of lesions examined | Number of lesions belonging to each category of staining extent <sup>a</sup> |                   |           |                   |
|-------------------------|----------------------------------|------------------------------------------------------------------------------|-------------------|-----------|-------------------|
|                         |                                  | Negative                                                                     | Slightly positive | Positive  | Strongly positive |
| Alveolar hyperplasia    | 96                               | 40 (41.7)                                                                    | 37 (38.5)         | 19 (19.8) | 0 (0)             |
| Adenoma                 | 26                               | 2 (7.7)                                                                      | 8 (30.8)          | 7 (26.4)  | 9 (34.6)          |
| Adenocarcinoma          | 27                               | 0 (0)                                                                        | 1 (3.7)           | 3 (11.1)  | 23 (85.2)         |
| Squamous metaplasia     | 10                               | 0 (0)                                                                        | 1 (10.0)          | 9 (90.0)  | 0 (0)             |
| Squamous cell carcinoma | 8                                | 0 (0)                                                                        | 1 (12.5)          | 0 (0)     | 7 (87.5)          |

<sup>a</sup>Numbers in parentheses represent percentage incidences.

( $P < 0.001$ ). Furthermore, the value for adenocarcinomas was significantly greater than that for adenomas ( $P < 0.001$ ). Although all squamous metaplasias were stained, none exhibited strong positivity (Table II). In contrast, 87.5% of squamous cell carcinomas were strongly positive (Figure 3C, Table II). It should be noted that all the cancers, for which MK mRNA expression was detected, demonstrated strongly positive anti-MK protein binding.

## Discussion

The present study clearly indicates the possible expression of MK mRNA and protein in BHP-induced lung adenocarcinomas and squamous cell carcinomas in rats, in contrast to the lack in normal tissue. MK protein expression increased with progression from alveolar hyperplasia to adenoma, and from adenoma to adenocarcinoma. A similar, but less pronounced, increase was also apparent with the transition from squamous cell metaplasia to squamous cell carcinomas. In both cases, levels were higher than in embryonal tissues assayed as positive controls. MK has been reported to serve as an autocrine mitogen for G401 cell line from a rhabdoid kidney tumor (22). This was thought to be mediated by a specific cell-surface receptor, which, in turn, activates a pathway consisting of Janus tyrosine kinases and signal transducers and activators of transcription (36). The architecture of the MK receptor complex, as well as the molecular mechanisms underlying the MK-induced signal transduction, however, remain to be

elucidated. Angiogenesis is a prerequisite for tumor growth (42) and Choudhuri *et al.* have described that overexpression of MK lead to endothelial growth-stimulating activity in MCF-7 breast carcinoma cells transfected with MK mouse cDNA that was cloned into plasmid DNA Ineo, which enhanced both tumor growth and vascular density (34). Taken together, the data suggested that MK may contribute to tumor growth and progression by virtue of its direct mitogenic and angiogenic effects. It is well known that various factors participate in tumor angiogenesis (1–5), but little is known about their relative importance or interactions with regard to angiogenic mechanisms. In human lung cancers, expression of vascular endothelial growth factor and pleiotrophin have been demonstrated (25,43). The present results suggest that MK may be expressed as an angiogenic factor in BHP-induced rat lung tumorigenesis, and thus work with other factors to enhance malignant potential.

Altered forms of growth factors or tumor suppressor gene products produced in tumor cells by alternative splicing are suggested to play important roles in tumorigenesis (30–32,45). Similarly, in the case of MK, it has recently been demonstrated that a truncated type of MK transcript, which encodes an alternatively spliced product that lacks the third exon, is expressed in pancreatic carcinoma cell lines (30), human colorectal (31) and breast cancers (32), but not in normal tissues (30–32). Because of the lack of an N-terminally located domain, the truncated form of MK is thought to lack a region

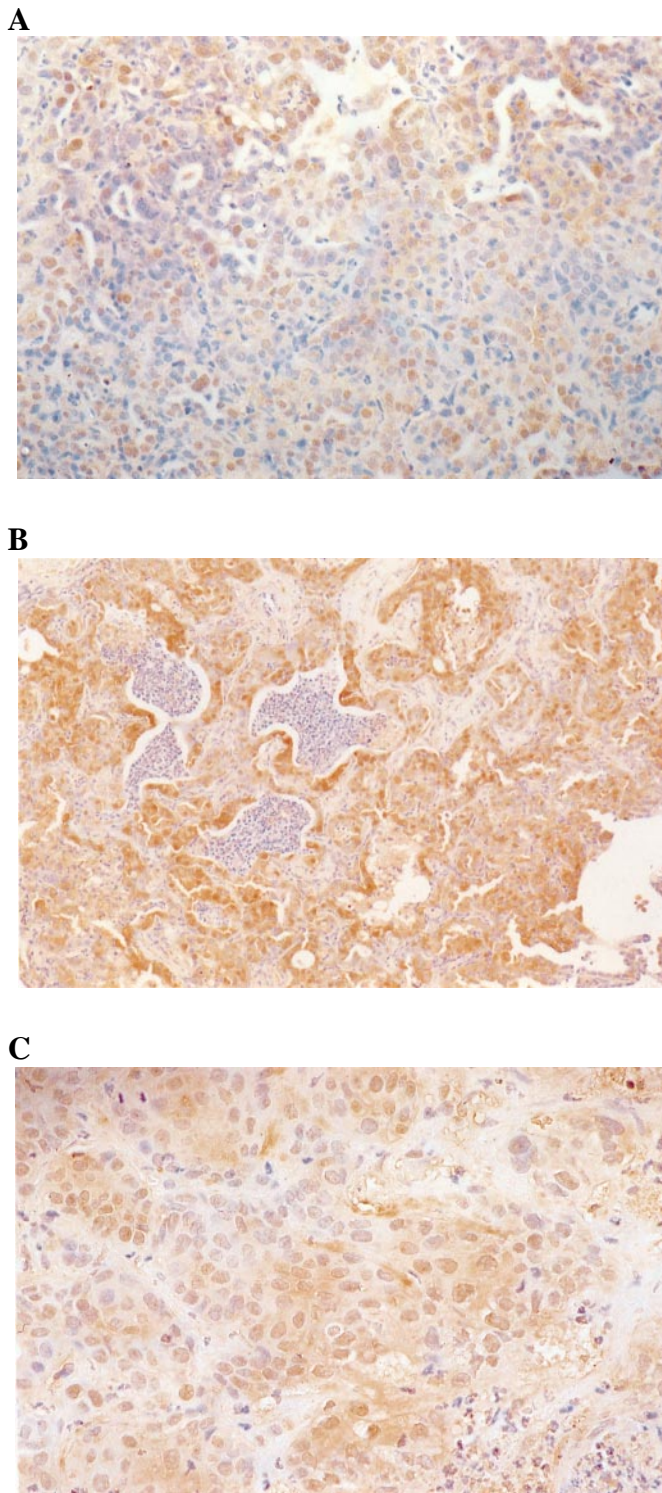

**Fig. 3.** Representative immunohistochemical demonstration of anti-MK binding in BHP-induced rat lung tumors. (A) Adenoma, (B) adenocarcinoma, (C) squamous cell carcinoma.

that is required for its proper localization in extracellular matrices, which results in disorganized cellular activity (30). Our RT-PCR analysis, however, did not reveal any truncated-type MK transcripts in the adenocarcinomas and squamous cell carcinomas examined. Therefore, alternative processing of MK mRNA may not contribute to BHP-induced development of lung tumors in rats.

Whereas progression of *N*-nitroso-*N*-methylurea-induced rat mammary tumors has been associated with a loss of the *MK* gene (33), expression has been observed from the early through to the terminal stages of diethylnitrosamine-induced rat liver carcinogenesis (Kanda *et al.*, manuscript in preparation). In the present case of BHP-induced rat lung carcinogenesis, *MK* was found to be expressed in more than half of the alveolar hyperplasias, most adenomas and all adenocarcinomas, as well as all squamous metaplasias and squamous cell carcinomas. Moreover, in both cases, the extent of immunohistochemical staining increased along with the malignant nature of the lesions. We are now focusing attention on the detailed mechanisms that underly *MK* expression in carcinogenesis.

#### Acknowledgements

We express our gratitude to Ms Kazue Ichida, Rie Maeda, Hiroko Masuda, Sachiko Nakai and Megumi Yamaguchi for their expert technical assistance. This study was in part supported by a Grant-in-Aid for Cancer Research from the Ministry of Education, Science, Sports and Culture of Japan and by a Grant-in-Aid for the 2nd Term Comprehensive 10-Year Strategy for Cancer Control, Cancer Prevention, from the Ministry of Health and Welfare of Japan.

#### References

1. Aaronson, S.A. (1991) Growth factors and cancer. *Science*, **254**, 1146–1153.
2. Cross, M. and Dexter, T.M. (1991) Growth factors in development, transformation and tumorigenesis. *Cell*, **64**, 271–280.
3. Heldin, C.H. and Westermark, B. (1989) Growth factors as transforming proteins. *Eur. J. Biochem.*, **184**, 487–496.
4. Folkman, J. (1986) How is blood vessel growth regulated in normal and neoplastic tissue? G.H.A. Clowes Memorial Award Lecture. *Cancer Res.*, **46**, 467–473.
5. Folkman, J., Watson, K., Ingber, D. and Hanahan, D. (1995) Induction of angiogenesis during the transition from hyperplasia to neoplasia. *Nature (London)*, **339**, 58–61.
6. Tsai, J.C., Goldman, C.K. and Gillespie, G.Y. (1995) Vascular endothelial growth factor in human glioma cell lines: induced secretion by EGF, PDGF-BB and bFGF. *J. Neurosurg.*, **82**, 864–873.
7. Bernfield, M., Kokenyesi, R., Kato, M., Hinkes, M.T., Spring, J., Gallo, R.L. and Lose, E.T. (1992) Biology of syndecans. *Ann. Rev. Cell. Biol.*, **8**, 365–393.
8. Chiquet-Ehrismann, R., Mackie, E.J., Reardon, C.A. and Sakakura, T. (1986) Tenascin, an extracellular matrix protein involved in tissue interactions during fetal development and organogenesis. *Cell*, **47**, 131–139.
9. Jalkanen, M., Elenius, K. and Rapraeger, A. (1993) Syndecan: regulator of cell morphology and growth factor action at the cell-matrix interface. *Trends Glycosci. Glycotechnol.*, **5**, 107–120.
10. Thesleff, I., Partanen, A.M. and Vainio, S. (1991) Epithelial–mesenchymal interactions in tooth morphogenesis: the roles of extracellular matrix, growth factors and cell surface receptors. *J. Craniof. Genet. Dev. Biol.*, **11**, 229–237.
11. Vainio, S., Karavanova, I., Jowett, A. and Thesleff, I. (1993) Identification of BMP-4 as a signal mediating secondary induction between epithelial and mesenchymal tissues during early tooth development. *Cell*, **75**, 45–58.
12. Ruoslahti, E. and Yamaguchi, Y. (1991) Proteoglycans as modulators of growth activities. *Cell*, **64**, 867–869.
13. Kadomatsu, K., Tomomura, M. and Muramatsu, T. (1988) cDNA cloning and sequencing of a new gene intensely expressed in early differentiation stages of embryonal carcinoma cell and in mid-gestation period of mouse embryogenesis. *Biochem. Biophys. Res. Commun.*, **151**, 1312–1328.
14. Tomomura, M., Kadomatsu, K., Matsubara, S. and Muramatsu, T. (1990) A retinoic acid-responsive gene, *MK*, found in the teratocarcinoma system. Heterogeneity of the transcript and the nature of the translation product. *J. Biol. Chem.*, **265**, 10765–10770.
15. Kadomatsu, K., Huang, R.-P., Suganuma, T., Murata, F. and Muramatsu, T. (1990) A retinoic acid responsive gene *MK* found in the teratocarcinoma system is expressed in a spatially and temporally controlled manner during mouse embryogenesis. *J. Cell. Biol.*, **110**, 607–616.
16. Mitsiadis, T.A., Salmivirta, M., Muramatsu, T., Muramatsu, H., Rauvala, H., Lehtonen, E., Jalkanen, M. and Thesleff, I. (1995) Expression of the heparin-binding cytokines, midkine (*MK*) and HB-GAM (pleiotrophin) is associated with epithelial–mesenchymal interactions during fetal development and organogenesis. *Development*, **121**, 37–51.

17. Mitsiadis, T.A., Muramatsu, T., Muramatsu, H. and Thesleff, I. (1995) Midkine (MK), a heparin-binding growth/differentiation factor, is regulated by retinoic and epithelial-mesenchymal interactions in the developing mouse tooth and affects cell proliferation and morphogenesis. *J. Cell. Biol.*, **129**, 267–281.
18. Muramatsu, H. and Muramatsu, T. (1991) Purification of recombinant midkine and examination of its biological activities: functional comparison of new heparin binding factors. *Biochem. Biophys. Res. Commun.*, **177**, 652–658.
19. Satoh, J., Muramatsu, H., Moretto, G. *et al.* (1993) Midkine that promotes survival of fetal human astrocytes in culture. *Dev. Brain Res.*, **75**, 201–205.
20. Michikawa, M., Kikuchi, S., Muramatsu, H., Muramatsu, T. and Kim, S.U. (1993) Retinoic acid responsive gene product, midkine, has neurotrophic functions for mouse spinal cord and dorsal root ganglion neurons in culture. *J. Neurosci. Res.*, **35**, 530–539.
21. Kojima, S., Muramatsu, H., Amanuma, H. and Muramatsu, T. (1995) Midkine is a heat and acid stable polypeptide capable of enhancing plasminogen activator activity and neurite outgrowth extension. *J. Biol. Chem.*, **270**, 9590–9596.
22. Muramatsu, H., Shirohama, H., Yonezawa, S., Maruta, H. and Muramatsu, T. (1993) Midkine, a retinoic acid-inducible growth/differentiation factor: immunohistochemical evidence for the function and distribution. *Dev. Biol.*, **159**, 392–402.
23. Nakagawara, A., Milbrandt, J., Muramatsu, T., Deuel, T., Zhao, H., Cnaan, A. and Brodeur, G. (1995) Differential expression of pleiotrophin and midkine in advanced neuroblastomas. *Cancer Res.*, **55**, 1792–1797.
24. Garver, R.I.Jr, Radford, D.M., Donis-Keller, H., Wick, M.R. and Milner, P.G. (1994) Midkine and pleiotrophin expression in normal and malignant breast tissue. *Cancer*, **74**, 1584–1590.
25. Garver, R.I.Jr, Chan, C.S. and Milner, P.G. (1993) Reciprocal expression of pleiotrophin and midkine in normal versus malignant lung tissues. *Am. J. Resp. Cell Mol. Biol.*, **9**, 463–466.
26. Tsutsui, J., Kadomatsu, K., Matsubara, S., Nakagawara, A., Hamanoue, M., Takao, S., Shimazu, H., Ohi, Y. and Muramatsu, T. (1993) A new family of heparin-binding growth/differentiation factor: increased midkine expression in Wilms' tumor and other human carcinomas. *Cancer Res.*, **53**, 1281–1285.
27. Mishima, K., Asai, A., Kadomatsu, K., Ino, Y., Nomura, K., Narita, Y., Muramatsu, T. and Kirino, T. (1997) Increased expression of midkine during the progression of human astrocytomas. *Neurosci. Lett.*, **233**, 29–32.
28. O'Brien, D., Cranston, D., Fuggle, S., Bicknell, R. and Harris, A.L. (1996) The angiogenic factor midkine is expressed in bladder cancer and overexpression correlates with a poor outcome in patient with invasive cancers. *Cancer Res.*, **56**, 2515–2518.
29. Aridome, K., Tsutsui, J., Takao, S., Kadomatsu, K., Ogawa, M., Aikou, K. and Muramatsu, T. (1995) Increased midkine gene expression in human gastrointestinal cancers. *Jpn. J. Cancer Res.*, **86**, 655–661.
30. Kaname, T., Kadomatsu, K., Aridome, K., Yamashita, S., Sakamoto, K., Ogawa, M., Muramatsu, T. and Yamamura, K. (1996) The expression of truncated MK in human tumors. *Biochem. Biophys. Res. Commun.*, **219**, 256–260.
31. Miyashiro, I., Kaname, T., Nakayama, T. *et al.* (1996) Expression of truncated midkine in human colorectal cancers. *Cancer Lett.*, **106**, 287–291.
32. Miyashiro, I., Kaname, T., Shin, E. *et al.* (1997) Midkine expression in human breast cancers: Expression of truncated form. *Breast Cancer Res. Treat.*, **43**, 1–6.
33. Chen, Y., McKenzie, K.E., Aldaz, C.M. and Sukumar, S. (1996) Midkine in the progression of rat *N*-nitroso-*N*-methylurea-induced mammary tumors. *Mol. Carcinogen.*, **17**, 112–116.
34. Choudhuri, R., Zhang, H.T., Donnini, S., Ziche, M. and Bicknell, R. (1997) An angiogenic role for the neurokinins midkine and pleiotrophin in tumorigenesis. *Cancer Res.*, **37**, 1814–1819.
35. Ratovitski, E.A. and Burrow, C.R. (1997) Midkine stimulates Wilms' tumor cell proliferation via its signaling receptor. *Cell Mol. Biol.*, **43**, 425–431.
36. Ratovitski, E.A., Kotzbauer, P.T., Milbrandt, J., Lowenstein, C.J. and Burrow, C.R. (1998) Midkine induces tumor cell proliferation and binds to a high affinity signaling receptor associated with JAK tyrosine kinases. *J. Biol. Chem.*, **273**, 3654–3660.
37. Kadomatsu, K., Hagihara, M., Akhter, S., Fan, Q.W., Muramatsu, H. and Muramatsu, T. (1997) Midkine induces the transformation of NIH3T3 cells. *Br. J. Cancer*, **75**, 359–359.
38. Nakanishi, T., Kadomatsu, K., Okamoto, T., Tomoda, Y. and Muramatsu, T. (1997) Expression of midkine and pleiotrophin in ovarian tumors. *Obstet. Gynecol.*, **90**, 285–290.
39. Konishi, Y., Kondo, H., Denda, A., Takahashi, S. and Inui, S. (1978) Lung carcinomas induced by oral administration of *N*-bis(2-hydroxypropyl)nitrosoamine in rats. In Severi, L. (ed.) *Tumors of Early Life in Man and Animals. Perugia Quadrennial International Conference of Cancer*. Division of Cancer Research, Perugia University, Perugia, pp. 637–649.
40. Kitada, H., Tsutsumi, M., Tsujiuchi, T., Takahama, M., Fukuda, T., Narita, N. and Konishi, Y. (1996) Frequent mutations of *Ki-ras* but no mutations of *Ha-ras* and *p53* in lung lesions induced by *N*-nitrosobis(2-hydroxypropyl)amine in rats. *Mol. Carcinogen.*, **15**, 276–283.
41. Nakae, D., Kobayashi, Y., Akai, H., Andoh, N., Satoh, H., Ohashi, K., Tsutsumi, M. and Konishi, Y. (1997) Involvement of 8-hydroxyguanine formation in the initiation of rat liver carcinogenesis by low dose levels of *N*-nitrosodiethylamine. *Cancer Res.*, **57**, 1281–1287.
42. Folkman, J. and Shing, Y. (1992) Angiogenesis. *J. Biol. Chem.*, **267**, 10931–10934.
43. Takahama, M., Tsutsumi, M., Tsujiuchi, T. *et al.* (1998) Frequent expression of the vascular endothelial growth factor in human non-small cell lung cancers. *Jpn. J. Clin. Oncol.*, **28**, 176–181.
44. Sakitani, H., Tsujiuchi, T., Kobitsu, K. *et al.* (1998) Increased telomerase activity and absence of *p53* mutation in oligo-astrocytomas induced by *N*-ethyl-*N*-nitrosourea in rats. *Cancer Lett.*, **126**, 157–164.
45. Haber, D.A., Park, S., Maheswaran, S., Englert, C., Re, G.G., Hazen-Martin, D.J., Sens, D.A. and Garvin, A.J. (1993) WT1-mediated growth suppression of Wilms' tumor cells expressing a WT1 splicing variant. *Science*, **262**, 2057–2059.

Received August 31, 1998; revised October 20, 1998;  
accepted October 29, 1998
